# Supplementary material
Source: publisher site journal article supplement (https://www.spandidos-publications.com/4958/downloadSupplementary)

Figure S1. Viability of cells transfected with si-CTGF and miR-26a inhibitors. The viability of 293 and mTECs after si-CTGF and miR-26a inhibitors transfection demonstrated no significant effects, as detected by CCK-8. Data are presented as mean  $\pm$  SD. miR, microRNA; mTECs, mouse tubular epithelial cells; NC, negative control; OD, optical density; si, small interfering RNA.

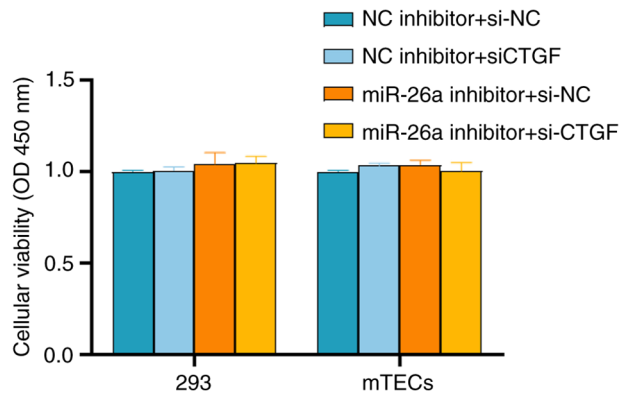

Figure S2. Immunofluorescence of the NCs. (A) The NC of E-cadherin,  $\alpha$ -SMA and fibronectin used in Fig. 1E. (B) The NC of E-cadherin,  $\alpha$ -SMA and fibronectin used in Fig. 2I. (C) The NC of  $\alpha$ -SMA used in Fig. 3G. (D) The NC of  $\alpha$ -SMA used in Fig. 5D. Scale bar, 50  $\mu$ m.  $\alpha$ -SMA,  $\alpha$ -smooth muscle actin; NC, negative control.

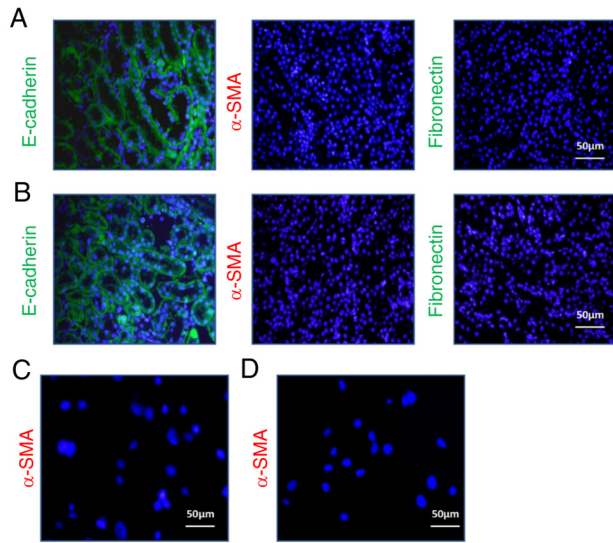

Supplement: Supplementary file 1 [file downloadSupplementary]
